# Supplementary material
Source: PubMed Central journal article supplement (PMC3716152)
Supplement: AAC.00169-13_zac999101824so1.pdf [file AAC.00169-13_zac999101824so1.pdf]

|                              | 4hr | 8hr | 12hr | 24hr | 48hr | 72hr |
|------------------------------|-----|-----|------|------|------|------|
| ctrl                         | 5   | 5   | 5    | 5    | 5    | 5    |
| LPS treated                  | 5   | 4   | 3    | 2    | 1    | 1    |
| TempL wild (1mg/kg)          | 5   | 5   | 5    | 5    | 5    | 5    |
| Q3K,TempL (0.25mg/kg)        | 5   | 5   | 5    | 5    | 5    | 5    |
| TempL wild (0.25mg/Kg)       | 5   | 5   | 3    | 2    | 2    | 2    |
| Polymyxin B                  | 5   | 5   | 5    | 5    | 5    | 5    |
| TempL wild (1mg/kg)+No LPS   | 5   | 5   | 5    | 5    | 5    | 5    |
| Q3K,TempL (0.25mg/kg)+No LPS | 5   | 5   | 5    | 5    | 5    | 5    |

**Table S1**

Detailed data of survival of mice after peptide and LPS treatments:

(Mean values are presented)

|           | Hemolytic Activity |                   | Anti-inflammatory activity    |                   |                                                                           |                   |
|-----------|--------------------|-------------------|-------------------------------|-------------------|---------------------------------------------------------------------------|-------------------|
|           | MHC <sub>50</sub>  | Fold <sup>a</sup> | MIC <sub>anti-endotoxin</sub> | Fold <sup>b</sup> | Therapeutic index<br>MHC <sub>50</sub> /<br>MIC <sub>anti-endotoxin</sub> | Fold <sup>c</sup> |
| TempL     | 21.8               | 1                 | 1                             | 1                 | 21.8                                                                      | 1                 |
| Q3K,TempL | 18.7               | 0.857798          | 0.25                          | 4                 | 74.8                                                                      | 3.4311926         |

**Table-S2**

**Summary of biological activities of TempL and its analog; determination of therapeutic potential.**

MHC<sub>50</sub> represents the minimum concentration ( $\mu\text{M}$ ) of TempL and Q3K,TempL required to induce 50% lysis of hRBCs; Fold<sup>a</sup> shows the fold improvement in MHC<sub>50</sub> values of individual peptides with respect to the native peptide. MIC<sub>anti-endotoxin</sub> represents minimum dose of the peptides (mg/Kg) required to attenuate lethal endotoxemia in LPS treated balb/c mice. Fold<sup>b</sup> shows fold improvement in MIC<sub>anti-endotoxin</sub> of these peptides in comparison to TempL. Therapeutic index (MHC<sub>50</sub>/MIC<sub>anti-endotoxin</sub>) denotes ratio of hemolytic (MHC<sub>50</sub>) and in vivo anti-LPS activity (MIC<sub>anti-endotoxin</sub>) activities of these peptides. Fold<sup>c</sup> shows the fold improvement in anti-inflammatory therapeutic indexes (MHC<sub>50</sub>/MIC<sub>anti-endotoxin</sub>) of the peptides with respect to TempL.

**Antibacterial activity of TempL and its analog (MIC values in  $\mu\text{M}$ )**

| <b>Bacteria</b>                              | <b>TempL</b> | <b>Q3K,TempL</b> |
|----------------------------------------------|--------------|------------------|
| <i>E.coli (ATCC 10536)</i>                   | 10 $\pm$ 0.5 | 5 $\pm$ 0.3      |
| <i>Pseudomonas auregenosa (ATCC BAA-427)</i> | 25 $\pm$ 0.5 | 12 $\pm$ 0.5     |

**Table S3**

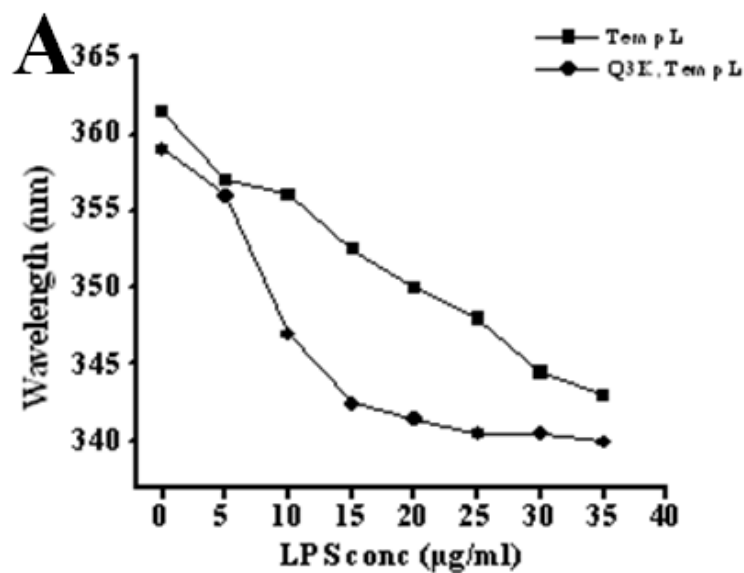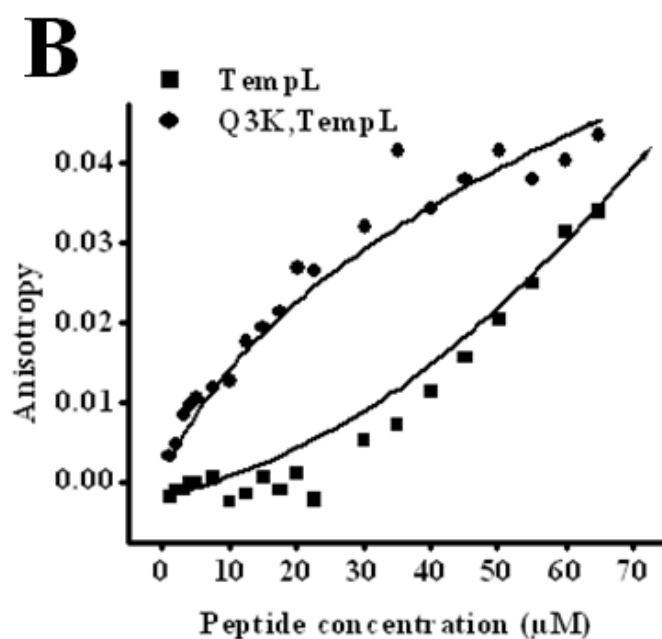

**FIG S1**

**FIG S1** Panel A shows the plot of tryptophan emission maxima of TempL (5µM) and Q3K,TempL(5µM) in presence of increasing concentrations of LPS. The shift of emission maxima of Q3K,TempL (—●—) to a shorter wavelength than TempL (—■—) in presence of LPS indicates the localization of the tryptophan residue of the former peptide to a more hydrophobic environment than the

latter peptide in this environment. *Panel B*, Binding of TempL and Q3K,TempL to LPS as monitored by the changes in anisotropy of FITC-LPS fluorescence as a function of increasing peptide concentrations. Symbols: (■), TempL; (●), Q3K,TempL.

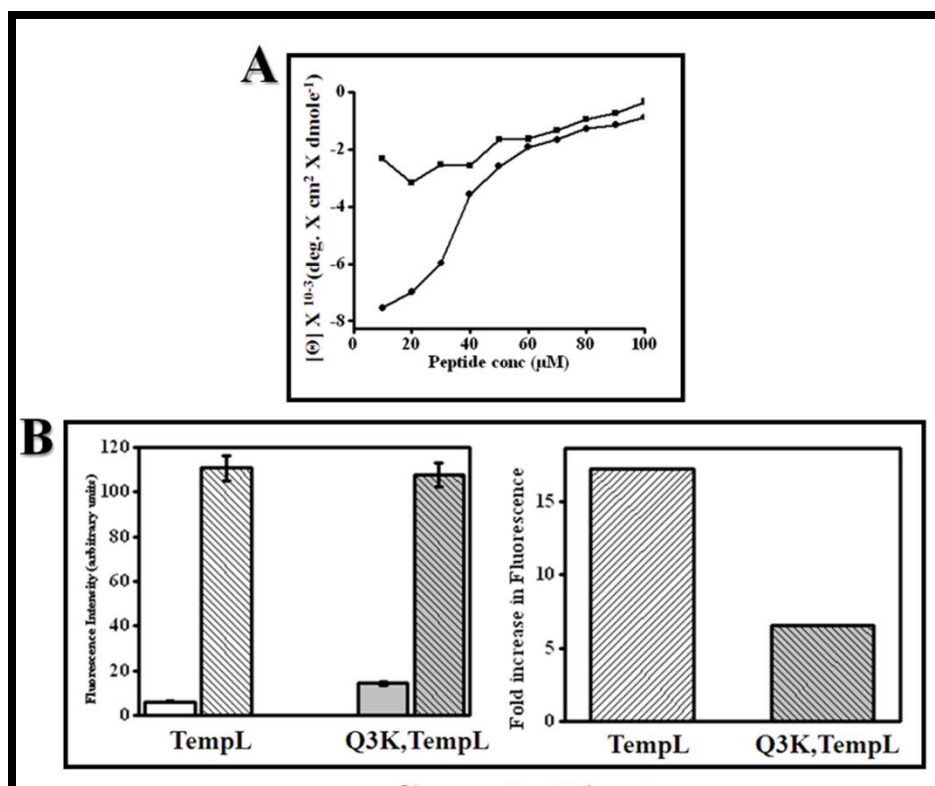

**FIG S2**

**Fig S2** Detection of self aggregation in TempL and Q3K,TempL by recording the concentration-dependent CD and fluorescence experiment. *Panel A* is the plot of corresponding mean residue ellipticity values at 222 nm *versus* peptide concentration in PBS with 1.5 M NaCl. Symbols;  $\blacksquare$ , TempL;  $\bullet$ , Q3K,TempL. *Panel B* shows the plot of fluorescence of Rho-TempL (0.25 $\mu\text{M}$ ) and Rho-Q3K,TempL (0.25 $\mu\text{M}$ ) before and after treatment of Proteinase K (100 $\mu\text{g/ml}$ ). In *Panel B, Left half*, Symbols:  $\square$  and  $\text{▨}$  are for Rho-TempL fluorescence before and after proteianse K treatments respectively and  $\text{▩}$  and  $\text{▧}$  stand for Rho-Q3K,TempL fluorescence before and after proteianse K treatments respectively. *Panel B, Right half* depicts the relative fold increment in rhodamine fluorescence of the respective peptide [TempL ( $\text{▩}$ ) and Q3K,TempL ( $\text{▧}$ )] after Proteinase K treatments.

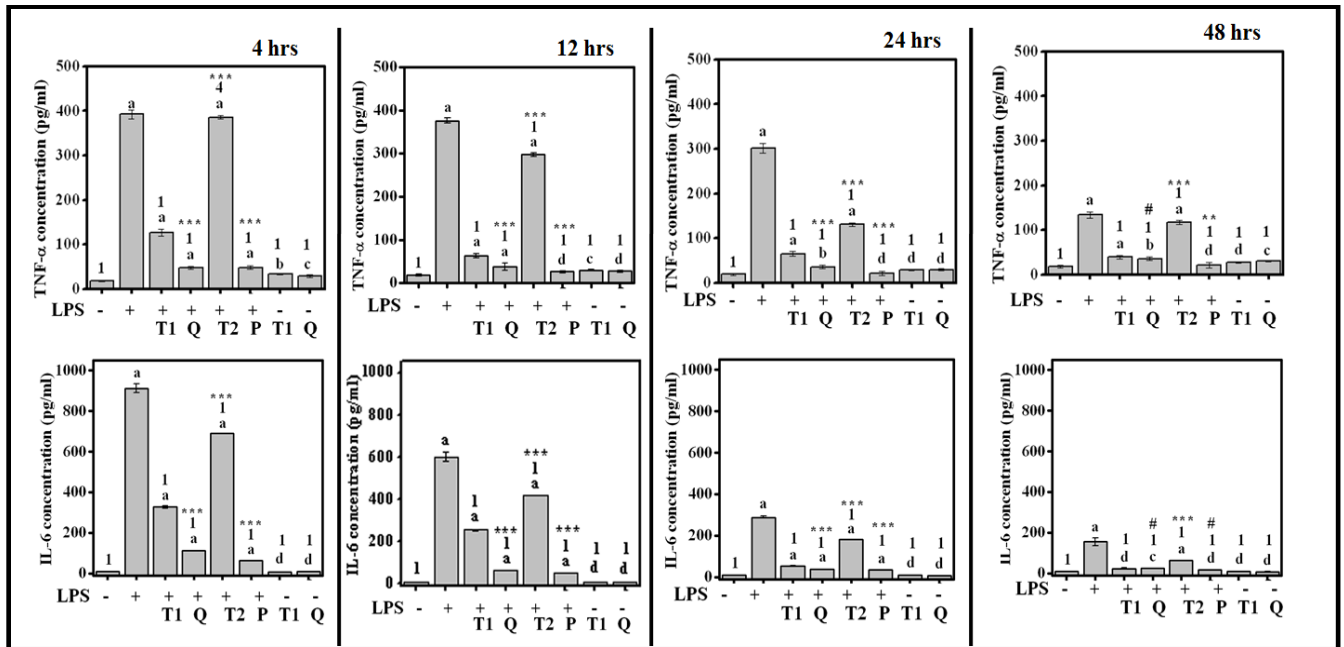

**FIG S3**

**Fig S3** Anti-inflammatory effects of TempL and Q3K,TempL by monitoring the levels of pro-inflammatory cytokines at different time points in the serum of LPS-treated Balb/C mice in the absence and presence of the peptides as described in the concerned part of Materials & Methods with statistical significances. *Upper panels* show the TNF  $\alpha$  levels in blood serum of LPS and peptide treated mice at 4, 12, 24 and 48 hours. *Lower panels* show the IL-6 concentration in blood serum of LPS and peptide treated mice at 4, 12, 24 and 48 hours. Results are presented as mean  $\pm$  SD, n=3, P values are indicated as \*\*\* P < 0.001, \*\*P < 0.01, \* P < 0.05, and # P > 0.05 vs TempL. (a) P<0.001, (b) <0.01, (c) <0.05 and (d) .05 vs untreated mice while (1) P<0.001 (2) <0.01 (3) P<0.05 and (4) >0.05 vs LPS treated mice. + or – symbolize the treatment or no treatment of LPS whereas T1 shows TempL (1mg/kg), Q shows Q3K,TempL (0.25mg/kg), T2 shows TempL (0.25mg/kg) and P shows Polymixin B (1mg/kg) peptide treatments.
